# Supplementary material
Source: MDPI journal article supplement (https://www.mdpi.com/2311-5637/9/2/98)
Supplement: s1 [file s1]

# Cellulose from *Posidonia oceanica* Sea Balls (Egagropili) as Substrate to Enhance *Streptomyces roseochromogenes* Cellulase Biosynthesis

Odile Francesca Restaino , Sabrina Cuomo, Sergio D'Ambrosio, Valentina Vassallo, Seyedeh Fatemeh Mirpoor, Concetta Valeria L. Giosafatto, Raffaele Porta and Chiara Schiraldi

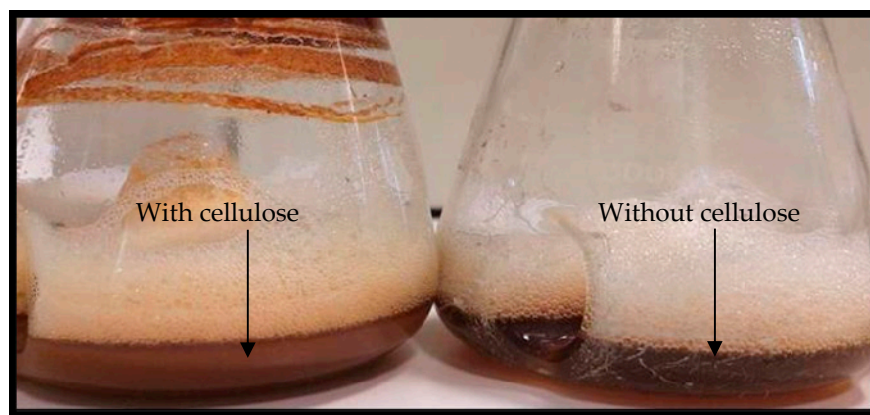

**Figure S1.** *S. roseochromogenes* shake flask growth on GEM III N medium with and without (control)  $2.5 \text{ g}\cdot\text{L}^{-1}$  of cellulose supplementation
